# Supplementary material for: Predictors of immunotherapy benefit in Merkel cell carcinoma
Source: PubMed Central journal article supplement (PMC7720777; doi:10.18632/oncotarget.27823), 2020-11-24
Supplement: oncotarget-11-4401-s001.pdf [file oncotarget-11-4401-s001.pdf]

## Predictors of immunotherapy benefit in Merkel cell carcinoma

### SUPPLEMENTARY MATERIALS

**Supplementary Table 1: Details of staging at diagnosis**

|            | Number of patients |
|------------|--------------------|
| Stage IIIA | 11                 |
| Stage IIIB | 17                 |
| cN0        | 12                 |
| cN1        | 20                 |
| cN2        | 5                  |
| cN3        | 7                  |
| cNX        | 1                  |
| pN0        | 11                 |
| pN1        | 20                 |
| pN2        | 5                  |
| pN3        | 7                  |
| pNX        | 2                  |

“c” indicates clinical staging, “p” indicates pathologic staging.

**Supplementary Table 2: Radiographic best response to immune checkpoint inhibitor therapy**

| Best response       | Total (n = 39) |
|---------------------|----------------|
|                     | Number (%)     |
| Complete response   | 13 (33)        |
| Partial response    | 4 (10)         |
| Stable disease      | 5 (13)         |
| Progressive disease | 17 (44)        |

Table includes the 39 patients with evaluable disease (underwent restaging scans following immune checkpoint inhibitor initiation).

**Supplementary Table 3: Specific amino acid alterations at single nucleotide variant sites.** See Supplementary Table 3
